# Supplementary material for: The mitochondrial genome sequences of the round goby and the sand goby reveal patterns of recent evolution in gobiid fish
Source: PubMed Central journal article supplement (PMC5314710; doi:10.1186/s12864-017-3550-8), 2017-02-16

Supplementary Figure 3

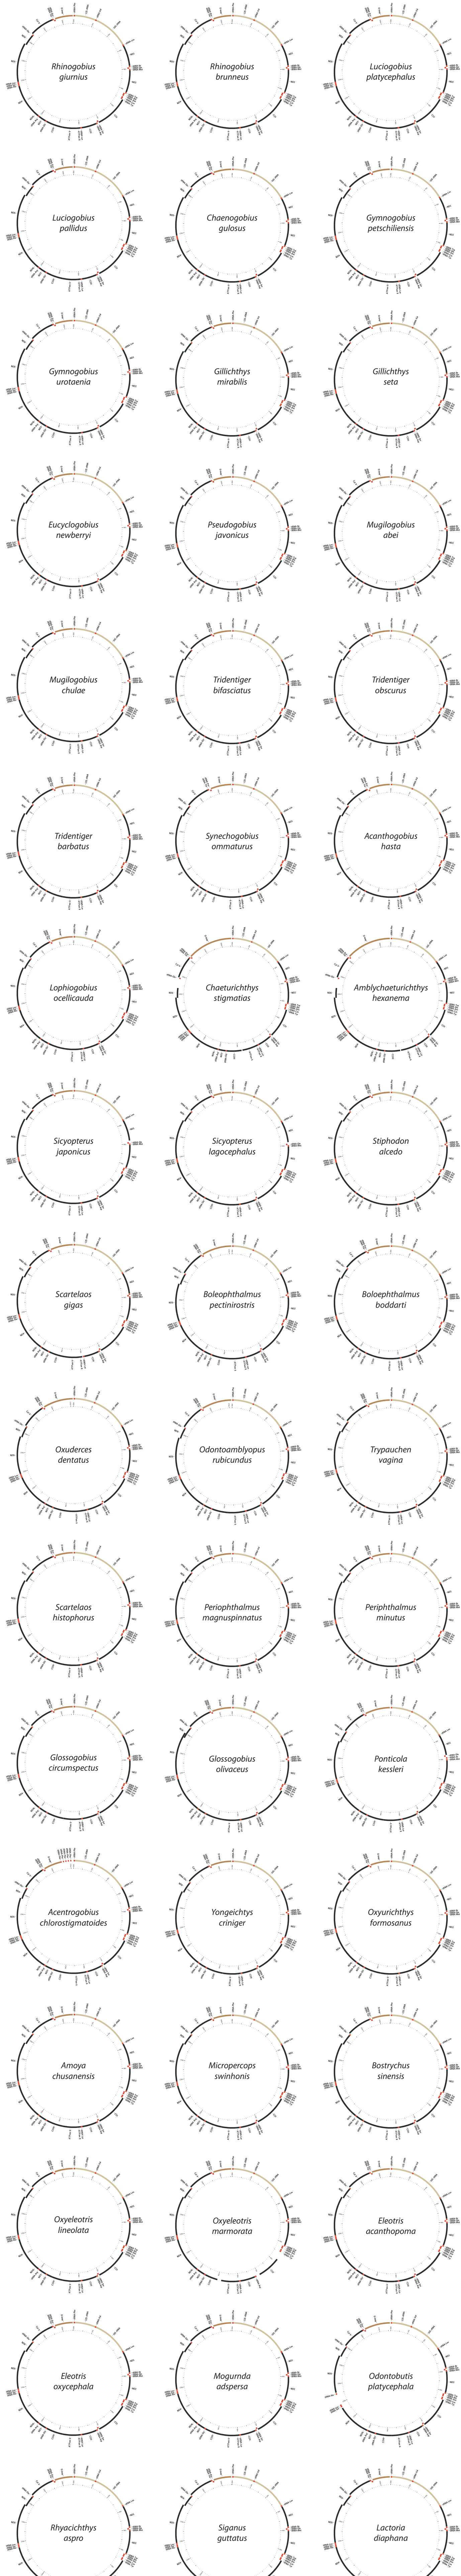

Supplement: 12864_2017_3550_MOESM3_ESM.pdf [file 12864_2017_3550_MOESM3_ESM.pdf]
